# Supplementary material for: Adipocyte-specific loss of PPARγ attenuates cardiac hypertrophy
Source: JCI journal article supplement (doi:10.1172/jci.insight.89908), 2016-10-05
Supplement: sd1 [file 1]

Supplemental figures

Figure S1.

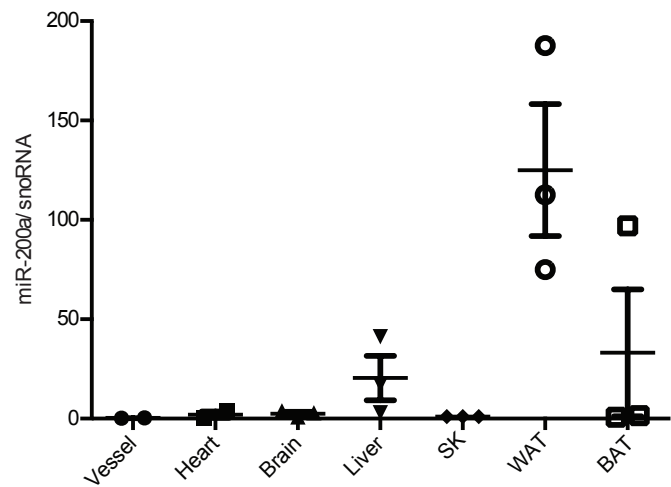

**Figure. S1: Tissue expression pattern of miR-200a.** Indicated tissues were collected from C57/BL6 mice and mature miR-200a levels were measured by qRT-PCR. SK: skeletal muscle; WAT: white adipose tissue; BAT: brown adipose tissue. snoRNA 202 was used as the internal control. n=3. Data is represented as mean ± SEM.

Figure S2.

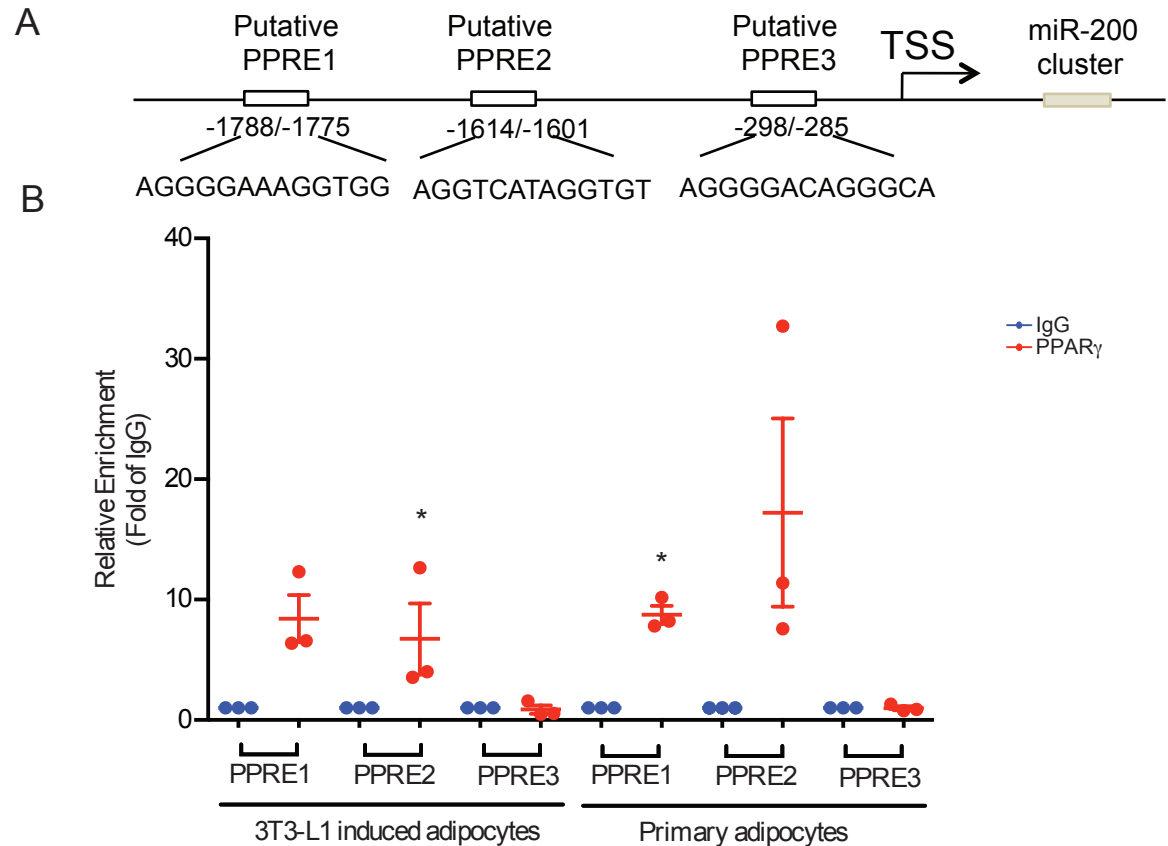

**Figure. S2: PPAR $\gamma$  binds to the promoter of miR-200 cluster.** (A) Bioinformatics revealed three putative conserved PPAR $\gamma$  responsive elements (PPREs) upstream of the transcription start site (TSS) of the miR-200 cluster. (B) 3T3-L1 induced adipocytes and primary adipocytes from C57/BL6 mice were cross-linked and immunoprecipitated with anti-PPAR $\gamma$  antibody or IgG. The immunoprecipitates were amplified with PCR using primers flanking the putative PPREs. Experiment was replicated three times. Data are represented as mean ± SEM; \*, p < 0.05 according to 2-tailed Student's t-test.

**Figure S3.**

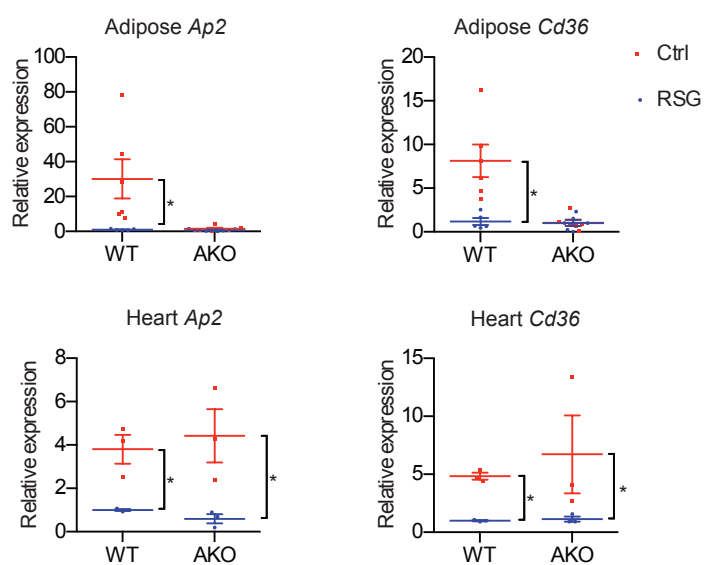

**Figure. S3: The expression of PPAR $\gamma$  target genes in adipose and cardiac tissue.** qRT-PCR detection of PPAR $\gamma$  target genes in adipose (A, B) and cardiac tissue (C, D) after 4 week RSG treatment of WT and adipose tissue-specific knockout (AKO) mice. n=3-5 mice per group. Data are represented as mean  $\pm$  SEM; \*, p < 0.05 according to one way ANOVA.

## Supplemental Methods

### ChIP assay

3T3-L1 induced adipocytes or primary adipocytes were cross-linked with 1% formaldehyde and quenched with 50 mM glycine-PBS before lysis and sonication. Sheared chromatin was immunoprecipitated with anti-PPAR $\gamma$  antibody (or control IgG) and protein A Dynabeads. The eluted immunoprecipitates were digested with proteinase K, DNA was extracted and underwent qPCR with primers specific for PPRE.

### Supplemental Tables

**Table S1. Antibodies used in this study.**

| Antibodies             | Source         | Catalogue Number |
|------------------------|----------------|------------------|
| PPAR $\gamma$          | Santa cruz     | sc-7196          |
| GAPDH                  | Santa cruz     | sc-32233         |
| TSC1                   | Cell Signaling | 4906             |
| mTOR                   | Cell Signaling | 2983             |
| Phospho-mTOR (Ser2448) | Cell Signaling | 5536             |

**Table S1. Primers used in this study.**

| Name                               | Orientation | Sequence                 |
|------------------------------------|-------------|--------------------------|
| <b>Luciferase reporter cloning</b> |             |                          |
| TSC1 3'UTR                         | Forward     | GATGGTCAATCAGTGTTAACTTGC |
| TSC1 3'UTR                         | Reverse     | GTTACAGTTAAACACAAGCAACTG |
| <b>ChIP Assay</b>                  |             |                          |
| PPRE1                              | Forward     | GGTTGAACAAAAACCAGGGT     |
| PPRE1                              | Reverse     | GGTCTGGTGCATATACACAA     |
| PPRE2                              | Forward     | AGTTATCCTTGTGGCTTCAG     |
| PPRE2                              | Reverse     | GGATCAGGCTCATCATTAGA     |
| PPRE3                              | Forward     | CACAGACACAAATACTGAGG     |
| PPRE3                              | Reverse     | GAGAACACCATTATGCCTTG     |
| <b>qRT-PCR</b>                     |             |                          |
| pri-miR-200a                       | Forward     | GTTCATGGCATCAGGTTTCC     |
| pri-miR-200a                       | Reverse     | GGGTCACCTTTGAACATCGT     |
| AP2                                | Forward     | GATGCCTTTGTGGGAACCT      |
| AP2                                | Reverse     | CTGTCGTCTGCGGTGATT       |
| CD36                               | Forward     | ATGGGCTGTGATCGGAAGT      |
| CD36                               | Reverse     | TTTGCCACGTCATCTGGGTTT-   |
| ANP                                | Forward     | GATAGATGAAGGCAGGAAGCCGC  |

|       |         |                            |
|-------|---------|----------------------------|
| ANP   | Reverse | AGGATTGGAGCCCAGAGTGGACTAGG |
| BNP   | Forward | TGTTTCTGCTTTTCCTTTATCTGTC  |
| BNP   | Reverse | CTCCGACTTTTCTCTTATCAGCTC   |
| GAPDH | Forward | CTCAAGATTGTCAGCAATGCATCC   |
| GAPDH | Reverse | CCAGTGGATGCAGGGATGATGTTC   |
